# Supplementary material for: Predicting the Risk of Postoperative Complications in Patients Undergoing Minimally Invasive Resection of Primary Liver Tumors
Source: PubMed Central journal article supplement (PMC7916554; doi:10.3390/jcm10040685), 2021-02-10
Supplement: jcm-10-00685-s001.pdf [file jcm-10-00685-s001.pdf]

**Table S1.** Model coefficients are depicted for the preoperative and postoperative model.

| <b>Variable</b>      | <b>Coefficient</b> |
|----------------------|--------------------|
| Preoperative Model   |                    |
| Intercept            | -2.20204           |
| Diabetes             | 1.00214            |
| Repeat hepatectomy   | 1.71543            |
| ALT                  | 0.01014            |
| Non-HCC              | 1.10619            |
| MILL approach        | -1.32158           |
| Postoperative model  |                    |
| Intercept            | -3.95018           |
| Diabetes             | 0.84134            |
| Repeat hepatectomy   | 1.93562            |
| ALT                  | 0.0092             |
| MILL approach        | -0.99688           |
| Length of surgery    | 0.00725            |
| Conversion performed | 3.19237            |

# Pattern

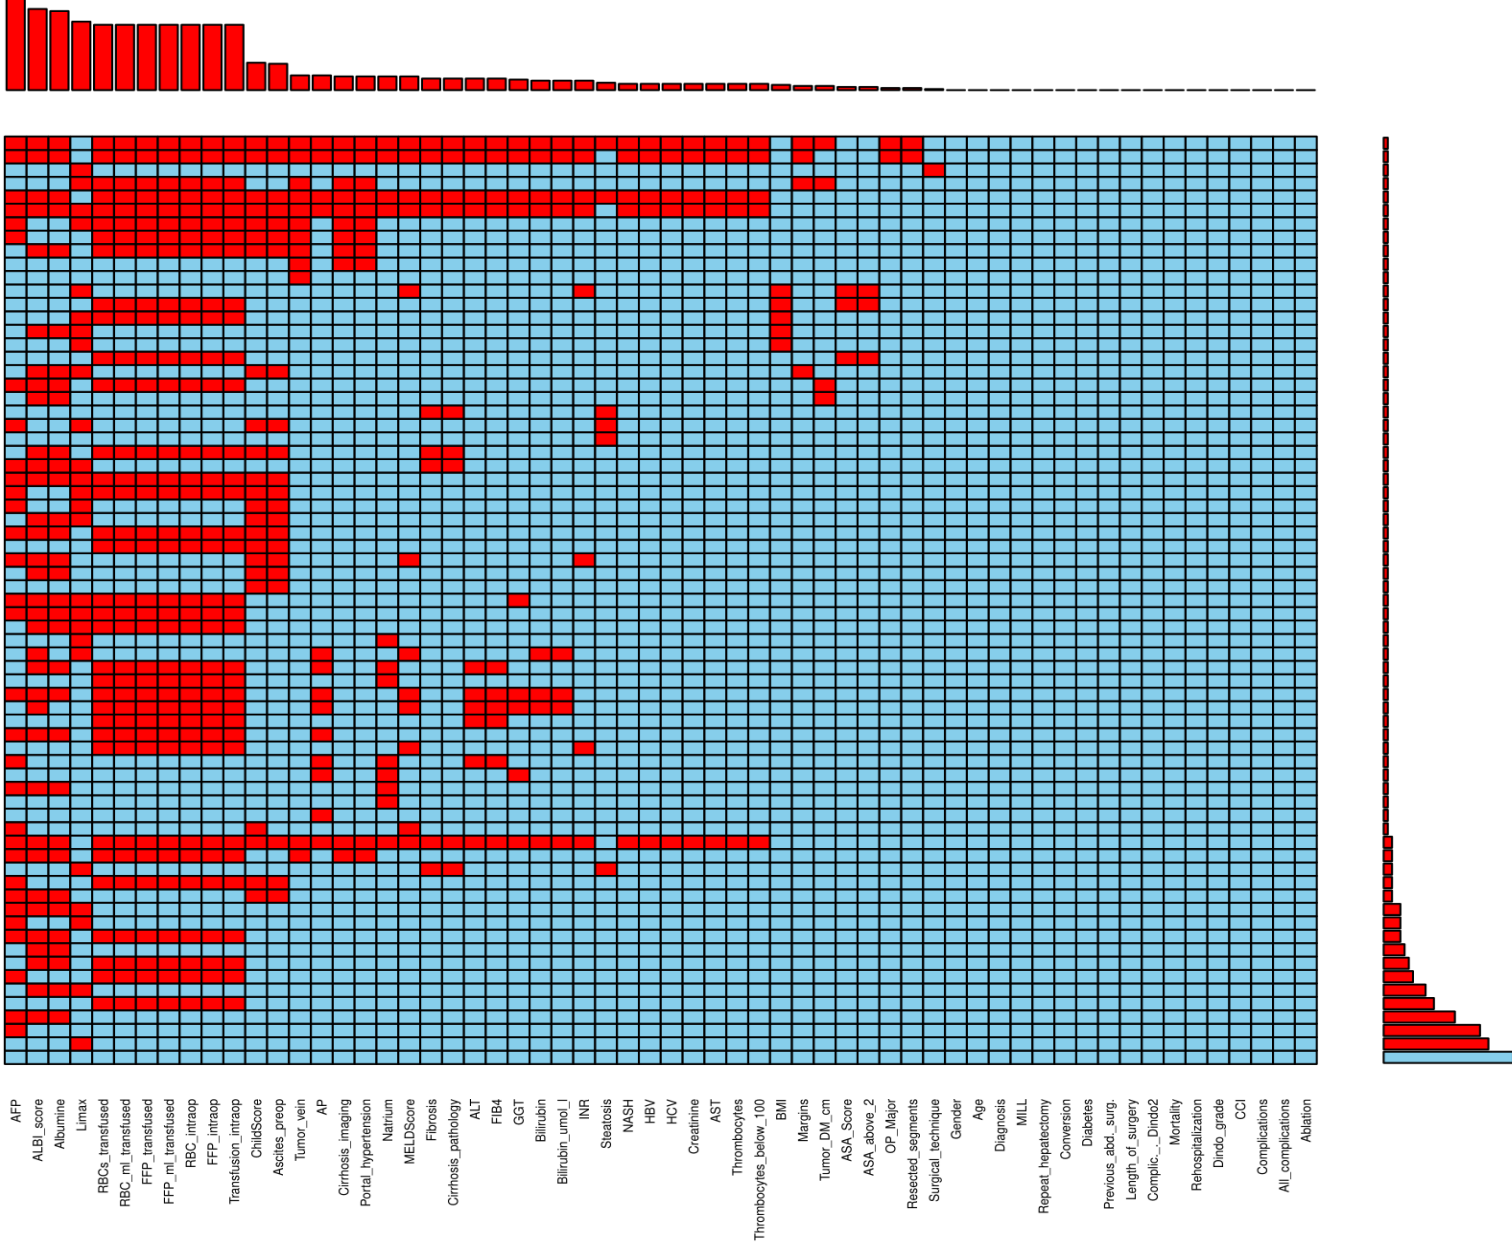

**Figure S1.** Missing data. Patterns of missing data are depicted in red, available data in light blue. Columns represent individual variables, whereas rows represent distinct patterns of missing information. Frequency of the observed pattern is depicted in each row. Most frequently missing data were AFP and ALBI score. Imputation of missing data was performed using the R mice package with 20 imputed datasets that were used to generate the models.

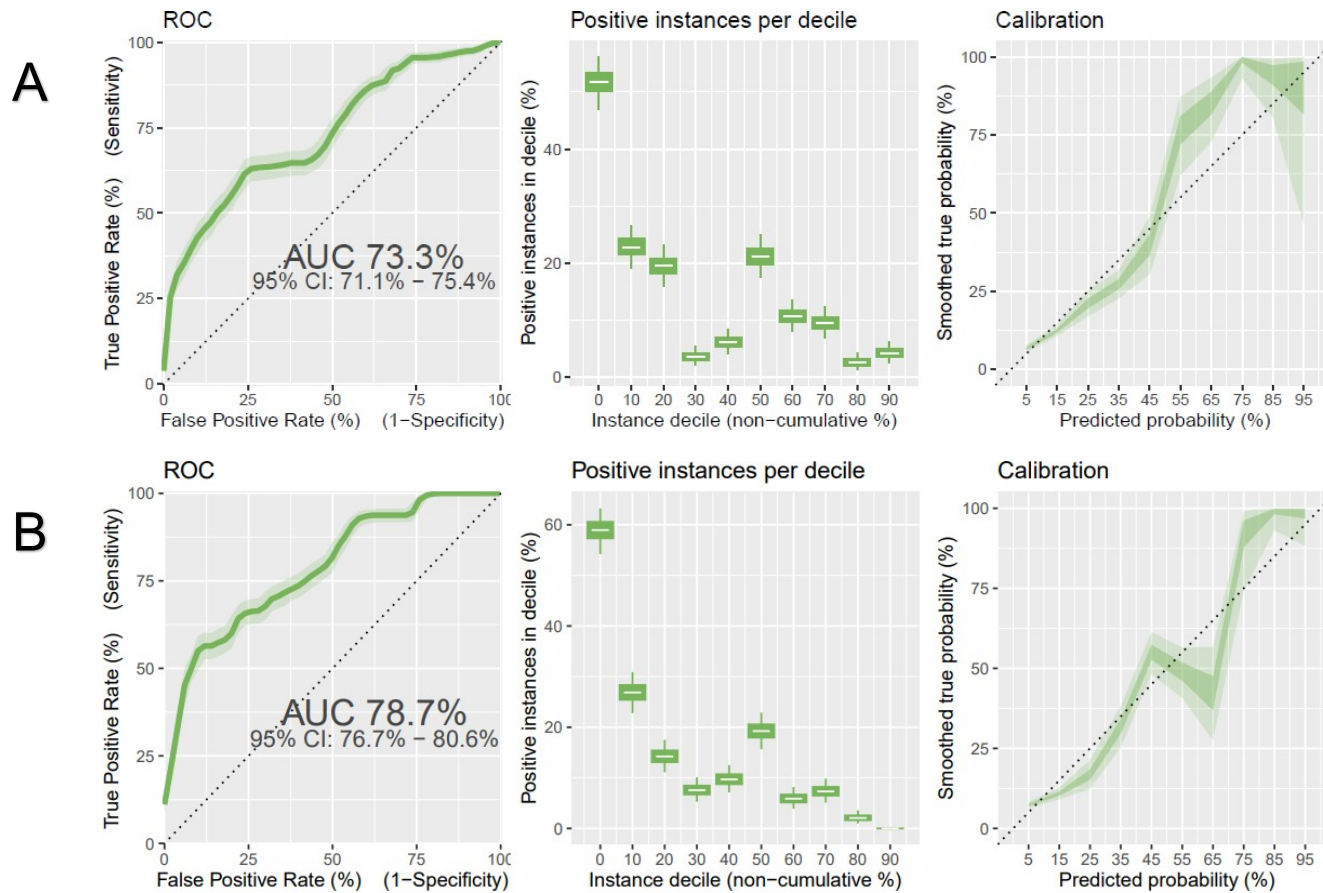

**Figure S2.** Model calibration. Calibration plots of the preoperative (**A**) and postoperative model (**B**). ROC curves as well as calibration plots with probabilities cut to deciles and as continuous variables are shown.
